# Supplementary material for: Biogeographic Distribution Patterns of the Archaeal Communities Across the Black Soil Zone of Northeast China
Source: Front Microbiol. 2019 Jan 25;10:23. doi: 10.3389/fmicb.2019.00023 (PMC6355713; doi:10.3389/fmicb.2019.00023)
Supplement: Table S2 — Relative abundance (%) of archaeal community at phylum, order and genus levels across all soil samples. [file Table_2.XLSX]

## Sheet: Sheet1
Table S2 Relative abundance (%) of archaeal community at phylum, order and genus levels across all soil samples.
	Sampling locations
Taxon	CT1	CT2	LS	GZL	CC	DH1	DH2	YS	FY	SC	HEB	HL1	BY	SH	SL	HL	BQ	KD	BA	WC1	WC2	NH1	NH2	NJ1	NJ2	NJ3	Average
Phylum
Crenarchaeota	0.0962348	0	2.74269	0.312763	0.0120294	0	0.0240587	0.0240587	0.0120294	0	0	0	0	0.0360881	0	0	0	0	0.0481174	0	0	0	0	0.0120294	0	0	0.127696
Euryarchaeota	7.69878	9.43101	11.8128	5.88235	7.28979	8.92578	2.76675	4.04186	4.45086	2.32166	2.50211	5.75003	1.14279	5.58162	5.93047	3.35619	3.29604	4.77565	6.66426	6.38759	13.2924	6.70035	4.30651	6.42367	4.99218	3.0314	5.72134
Thaumarchaeota	92.205	90.569	85.4445	93.8049	92.6982	91.0742	97.2092	95.9341	95.5371	97.6783	97.4979	94.25	98.8572	94.3823	94.0695	96.6438	96.704	95.2243	93.2876	93.6124	86.7076	93.2997	95.6935	93.5643	95.0078	96.9686	94.151
Order
Desulfurococcales	0	0	0.216528	0	0	0	0	0	0	0	0	0	0	0	0	0	0	0	0	0	0	0	0	0	0	0	0.00832801
Thermoproteales	0.0962348	0	2.52616	0.312763	0.0120294	0	0.0240587	0.0240587	0.0120294	0	0	0	0	0.0360881	0	0	0	0	0.0481174	0	0	0	0	0.0120294	0	0	0.119368
Archaeoglobales	0.0120294	0	0.108264	0	0	0	0	0	0	0	0	0	0	0	0	0	0	0	0	0	0	0	0	0	0	0	0.00462667
Euryarchaeota_norank	0.0240587	0.0481174	0.0240587	0	0	0	0	0	0	0	0	0	0	0.0240587	0	0	0	0.0721761	0.0360881	0.0120294	0.0360881	0.0842055	0.108264	0	0.0240587	0	0.0189694
Halobacteriales	0.348851	0.0721761	0.348851	0	0	0	0	0	0	0.0360881	0	0	0	0	0	0	0	0	0.0120294	0	0	0	0	0	0	0	0.0314614
Methanobacteriales	1.75629	2.58631	5.25683	2.15325	3.17575	5.49741	1.35932	1.26308	1.64802	0.601468	0.817996	1.97281	0.240587	1.62396	2.14122	1.3112	1.13076	1.90064	1.91267	1.79237	5.29291	2.23746	1.3954	1.78034	1.02249	1.22699	2.04221
Methanocellales	0	0	0.156382	0	0	0.0120294	0	0	0	0	0	0	0	0	0	0	0	0	0	0	0	0	0	0	0	0	0.00647734
Methanococcales	0.132323	0.276675	0.204499	0.0601468	0	0.0120294	0	0.0240587	0.0120294	0.0120294	0.0120294	0	0.0360881	0.0360881	0.132323	0.0962348	0.0360881	0.0962348	0.0962348	0.120294	0.0481174	0.204499	0.0120294	0.0120294	0.132323	0.0240587	0.0703254
Methanomassiliicoccales	4.16216	5.87032	3.01937	3.15169	3.8133	3.36822	1.37135	2.58631	2.76675	1.56382	1.55179	3.71707	0.74582	3.5246	3.29604	1.55179	1.90064	2.39384	3.45242	4.10201	5.60568	3.18778	2.68255	4.33057	3.27198	1.70817	3.02677
Methanomicrobiales	0.0721761	0	0.0481174	0	0	0	0.0120294	0	0	0	0	0	0	0.0601468	0.0120294	0	0	0	0	0	0	0	0	0	0	0	0.00786535
Methanosarcinales	1.16685	0.517262	2.56225	0.517262	0.264646	0.0120294	0.0240587	0	0.0240587	0.108264	0.120294	0.0240587	0.120294	0.156382	0.0962348	0.168411	0.0721761	0.156382	1.08264	0.19247	0.396969	0.469145	0.0721761	0.0601468	0.0721761	0.0481174	0.327106
Thermococcales	0.0240587	0.0601468	0.0842055	0	0.0360881	0.0240587	0	0.168411	0	0	0	0.0360881	0	0.156382	0.252616	0.228558	0.156382	0.156382	0.0721761	0.168411	1.91267	0.517262	0.0360881	0.240587	0.469145	0.0240587	0.18553
Nitrosopumilales	5.41321	0	7.80705	0.56538	0	0	0	0.0240587	0	0.0360881	0	0.0120294	0.0360881	0	0	0	0	0	0.0721761	0	0	0	0	0	0	0	0.537157
Nitrososphaerales	82.3169	80.8012	68.8199	84.0611	58.5228	70.3837	61.073	90.0277	94.3582	97.546	97.4979	83.8807	98.6046	87.4053	86.082	95.8619	94.5627	95.0559	93.2034	92.614	86.058	91.9644	94.9356	93.5523	94.8755	96.9686	87.3474
Thaumarchaeota_norank	4.47492	9.76783	8.81751	9.1784	34.1754	20.6905	36.1362	5.88235	1.17888	0.0962348	0	10.3573	0.216528	6.97702	7.98749	0.781908	2.14122	0.168411	0.0120294	0.998436	0.649585	1.33526	0.757849	0.0120294	0.132323	0	6.26637
Genus
Staphylothermus	0	0	0.216528	0	0	0	0	0	0	0	0	0	0	0	0	0	0	0	0	0	0	0	0	0	0	0	0.00832801
Thermofilum	0.0962348	0	2.52616	0.312763	0.0120294	0	0.0240587	0.0240587	0.0120294	0	0	0	0	0.0360881	0	0	0	0	0.0481174	0	0	0	0	0.0120294	0	0	0.119368
Palaeococcus	0.0240587	0.0601468	0.0842055	0	0.0360881	0.0240587	0	0.168411	0	0	0	0.0360881	0	0.156382	0.252616	0.228558	0.156382	0.156382	0.0721761	0.168411	1.91267	0.517262	0.0360881	0.240587	0.469145	0.0240587	0.18553
Aciduliprofundum	0.0240587	0.0481174	0.0240587	0	0	0	0	0	0	0	0	0	0	0.0240587	0	0	0	0.0721761	0.0360881	0.0120294	0.0360881	0.0842055	0.108264	0	0.0240587	0	0.0189694
Ferroglobus	0.0120294	0	0.108264	0	0	0	0	0	0	0	0	0	0	0	0	0	0	0	0	0	0	0	0	0	0	0	0.00462668
Salarchaeum	0.348851	0.0721761	0.348851	0	0	0	0	0	0	0.0360881	0	0	0	0	0	0	0	0	0.0120294	0	0	0	0	0	0	0	0.0314614
Methanobacterium	1.52773	2.38181	4.57115	2.05702	3.04343	5.46133	1.20294	1.19091	1.62396	0.589438	0.781908	1.90064	0.216528	1.43149	1.91267	1.09467	1.09467	1.78034	1.75629	1.66005	3.15169	1.81643	1.27511	1.07061	0.721761	0.938289	1.77896
Methanobrevibacter	0.168411	0.204499	0.577409	0.0721761	0.132323	0.0360881	0	0.0721761	0.0240587	0.0120294	0.0360881	0.0721761	0	0.18044	0.216528	0.204499	0.0360881	0.120293	0.120293	0.132323	2.14122	0.421027	0.120293	0.709732	0.300734	0.288704	0.246139
Methanocaldococcus	0.0481174	0.0601468	0.0481174	0	0	0	0	0	0	0	0	0	0	0	0.0962348	0	0	0	0	0	0	0.0120294	0	0	0	0	0.0101787
Methanocella	0	0	0.156382	0	0	0.0120294	0	0	0	0	0	0	0	0	0	0	0	0	0	0	0	0	0	0	0	0	0.00647735
Methanococcoides	0.0481174	0.120293	0.252616	0	0	0	0.0120294	0	0	0	0	0	0	0.0120294	0	0.0240587	0	0.0240587	0.0360881	0	0	0	0	0	0	0	0.0203574
Methanococcus	0.0240587	0.0721761	0.0962348	0.0120294	0	0	0	0	0	0.0120294	0	0	0	0	0	0.0120294	0	0	0.0481174	0	0	0	0	0	0	0	0.0106414
Methanoculleus	0.0721761	0	0	0	0	0	0	0	0	0	0	0	0	0.0601468	0.0120294	0	0	0	0	0	0	0	0	0	0	0	0.00555201
Methanomassiliicoccus	4.16216	5.87032	3.01937	3.15169	3.8133	3.36822	1.37135	2.58631	2.76675	1.56382	1.55179	3.71707	0.74582	3.5246	3.29604	1.55179	1.90064	2.39384	3.45242	4.10201	5.60568	3.18778	2.68255	4.33057	3.27198	1.70817	3.02677
Methanosaeta	0.986407	0.396969	2.11717	0.481174	0.264646	0.0120294	0.0120294	0	0.0120294	0.108264	0.120293	0.0240587	0.120293	0.108264	0.0962348	0.144352	0.0721761	0.132323	1.03452	0.19247	0.396969	0.469145	0.0721761	0.0481174	0.0721761	0.0481174	0.290092
Methanosarcina	0.132323	0	0.19247	0.0360881	0	0	0	0	0.0120294	0	0	0	0	0.0360881	0	0	0	0	0.0120294	0	0	0	0	0.0120294	0	0	0.016656
Methanosphaera	0.0481174	0	0.108264	0.0240587	0	0	0	0	0	0	0	0	0	0	0.0120294	0	0	0	0	0	0	0	0	0	0	0	0.00740268
Methanosphaerula	0	0	0.0481174	0	0	0	0.0120294	0	0	0	0	0	0	0	0	0	0	0	0	0	0	0	0	0	0	0	0.00231334
Methanothermobacter	0.0120294	0	0	0	0	0	0.156382	0	0	0	0	0	0.0240587	0.0120294	0	0.0120294	0	0	0.0360881	0	0	0	0	0	0	0	0.00971602
Methanothermococcus	0.0360881	0.0962348	0.0240587	0.0481174	0	0.0120294	0	0.0240587	0.0120294	0	0.0120294	0	0.0360881	0.0360881	0.0360881	0.0721761	0.0360881	0.0962348	0.0240587	0.120293	0.0481174	0.19247	0.0120294	0.0120294	0.132323	0.0240587	0.0439534
Methanotorris	0.0240587	0.0481174	0.0360881	0	0	0	0	0	0	0	0	0	0	0	0	0.0120294	0	0	0.0240587	0	0	0	0	0	0	0	0.00555201
Nitrosotalea (Group 1.1a associated)	4.47492	9.76783	8.81751	9.1784	34.1754	20.6905	36.1362	5.88235	1.17888	0.0962348	0	10.3573	0.216528	6.97702	7.98749	0.781908	2.14122	0.168411	0.0120294	0.998436	0.649585	1.33526	0.757849	0.0120294	0.132323	0	6.26637
Nitrosopumilus (Group 1.1a)	5.41321	0	7.80705	0.565379	0	0	0	0.0240587	0	0.0360881	0	0.0120294	0.0360881	0	0	0	0	0	0.0721761	0	0	0	0	0	0	0	0.537157
Nitrososphaera (Group 1.1c)	0	0	0.0240587	0.0842055	0.216528	0.0120294	0.144352	0	0	0	0	0.0721761	0.0240587	0.0360881	0.433057	0.156382	0.0721761	0.0360881	0	0.0360881	0.890172	0.156382	0.0481174	0.481174	0.19247	0	0.119831
Nitrososphaera (Group 1.1b)	82.3169	80.8012	68.7959	83.9769	58.3063	70.3717	60.9287	90.0277	94.3582	97.546	97.4979	83.8085	98.5805	87.3692	85.649	95.7055	94.4906	95.0198	93.2034	92.5779	85.1678	91.808	94.8875	93.0711	94.683	96.9686	87.2276
